# Supplementary material for: Rosseau y la naturaleza vegetal: una propuesta de moral estética
Source: Springer Nature journal article supplement (doi:10.1038/ncomms4377), 2004-01-01
Supplement: 41467_2014_BFncomms4377_MOESM782_ESM.pdf [file 41467_2014_BFncomms4377_MOESM782_ESM.pdf]

Supplementary Figures:

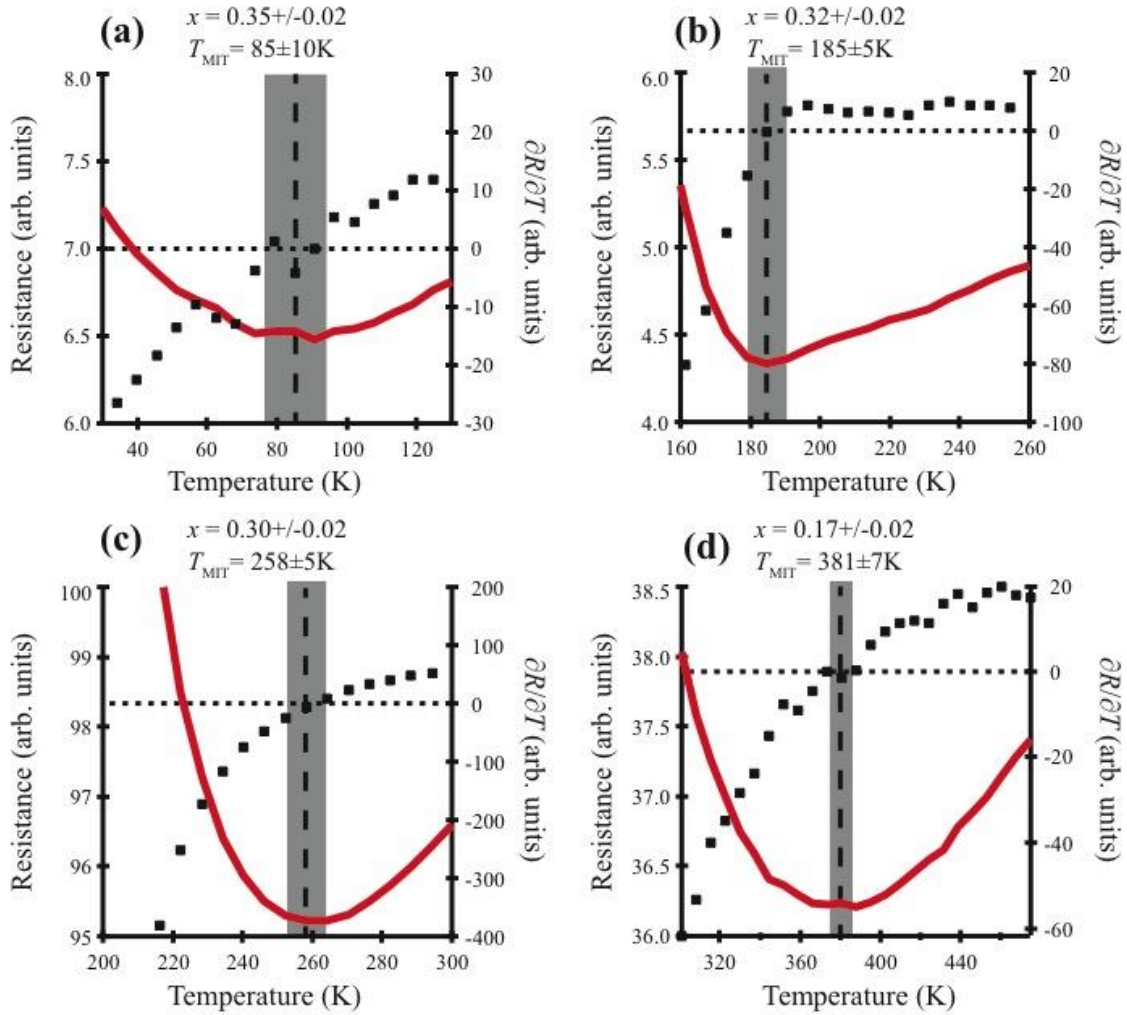

**Supplementary Figure 1:** Resistance (red lines) and its first derivative  $\delta R/\delta T$  plotted (black squares) plotted as a function of temperature for  $\text{Sr}_3(\text{Ir}_{1-x}\text{Ru}_x)_2\text{O}_7$  samples with (a)  $x=0.35$ , (b)  $x=0.32$ , (c)  $x=0.3$ , and (d)  $x=0.17$  respectively. Vertical dashed lines show the temperature  $T_{\text{MIT}}$  plotted in the electronic phase diagram of Fig. 1 (a) in the paper's main text. Shaded grey region shows the uncertainty in determining  $T_{\text{MIT}}$ . Ru x-concentrations were measured for each sample with the corresponding uncertainty displayed in each panel. Resistance and  $\delta R/\delta T$  are plotted as raw data in arbitrary units without geometric conversion to resistivity.

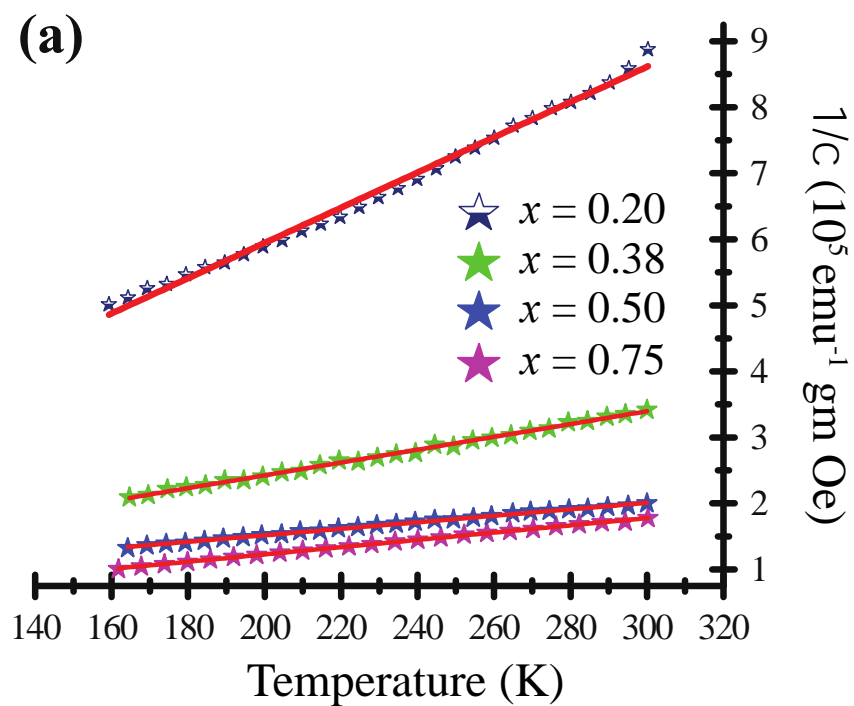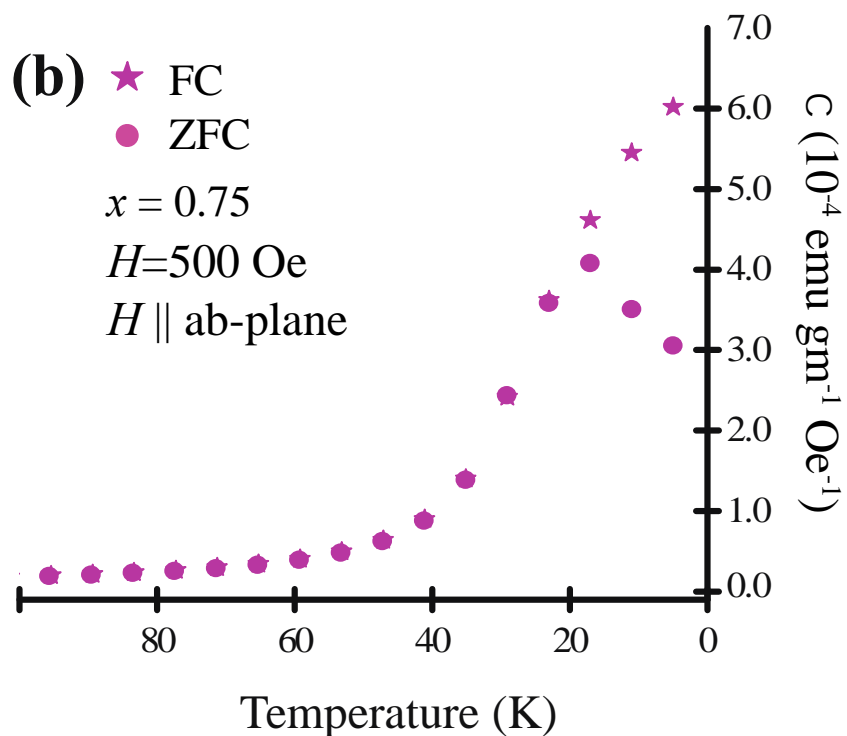

**Supplementary Figure 2:** (a)  $\chi^{-1}$  as a function plotted as a function of temperature. A 500 Oe field was applied parallel to the ab-plane for all concentrations with the exception of  $x=0.2$  where a 1 T field was applied. Solid lines are fits to Curie-Weiss behavior. (b) Zero-field cooled (ZFC) and field cooled (FC) magnetization data collected for the  $x=0.75$  concentration.  $1 \text{ emu g}^{-1} \text{ Oe}^{-1} = 4\pi \times 10^{-3} \text{ m}^3/\text{kg}$ .

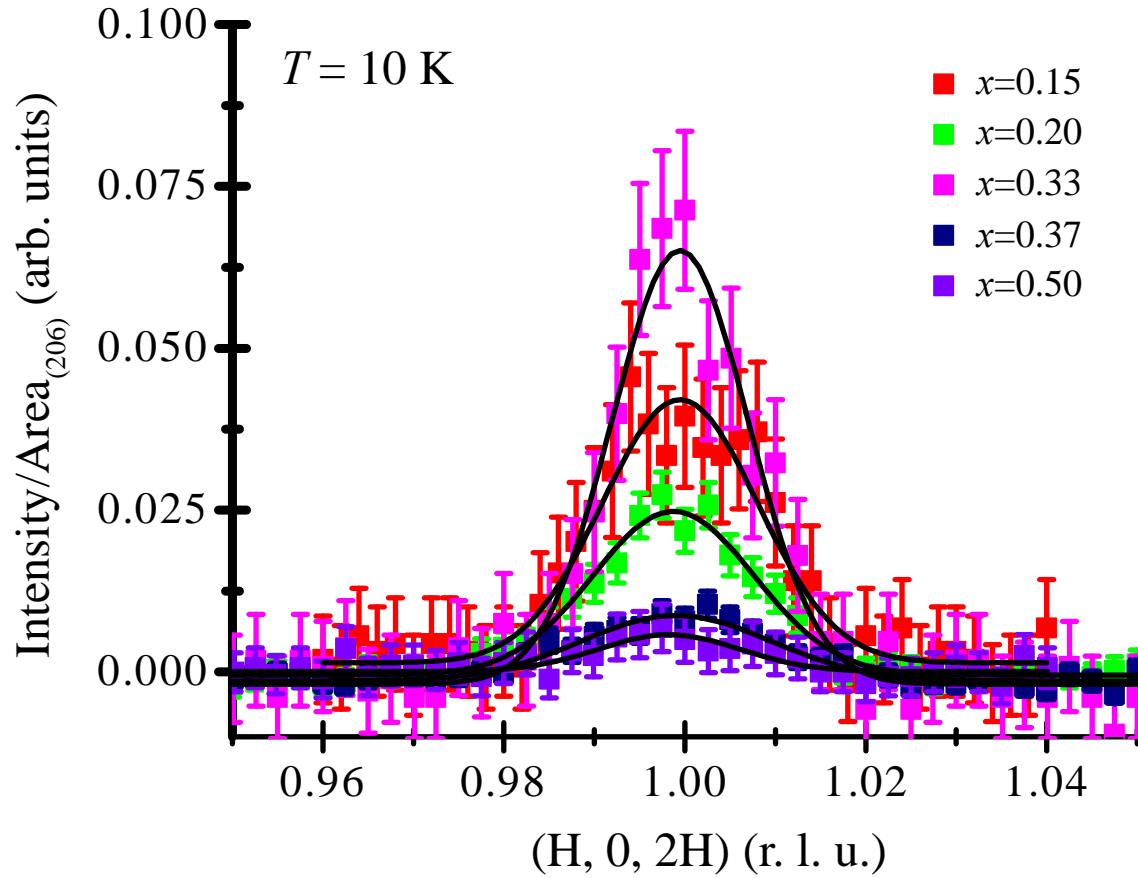

**Supplementary Figure 3:** Radial scans through the antiferromagnetic Bragg reflection  $\mathbf{Q}=(1,0,2)$  for select concentrations of  $\text{Sr}_3(\text{Ir}_{1-x}\text{Ru}_x)_2\text{O}_7$ . Intensity for each sample has been divided by the integrated area of the sample's corresponding  $\mathbf{Q}=(2,0,6)$  nuclear Bragg reflection. Before correcting for minor changes in absorption and extinction between Ru-concentrations this plot provides a rough illustration of the moment evolution as a function of  $x$ . Solid lines are Gaussian fits to the data. Error bars are one standard deviation. An additional sample, not plotted here, with nominal  $x=0.32$  was measured with a normalized scattering intensity that saturates at 0.3 (off the scale) and the corresponding AF moment plotted in Fig. 3 (c) of the main text.

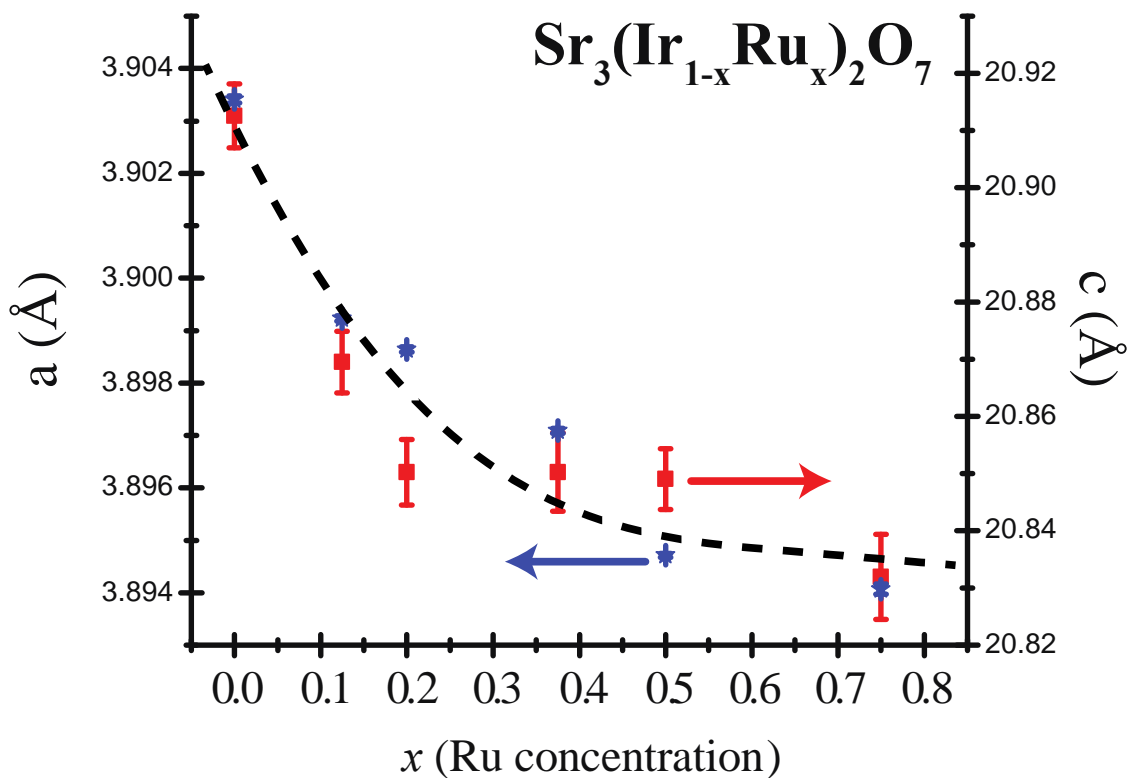

**Supplementary Figure 4:** Lattice parameters determined via powder x-ray diffraction on crushed crystals plotted as a function of Ru-doping for  $\text{Sr}_3(\text{Ir}_{1-x}\text{Ru}_x)_2\text{O}_7$  at 300K. Data was refined using the FullProf Rietveld refinement program<sup>1</sup>. Dashed line is a guide to the eye. While the reduction in lattice constants is monotonic, it is not linear and seemingly maps the nonlinear contraction previously observed in  $\text{Sr}_2(\text{Ir}_{1-x}\text{Ru}_x)\text{O}_4$ .<sup>2</sup> Error bars are one standard deviation.

Supplementary References:

<sup>1</sup> J. Rodriguez-Carvajal, Recent Advances in Magnetic Structure Determination by Neutron Powder Diffraction, *Physica B* 192, 55 (1993).

<sup>2</sup> R. J. Cava, B. Batlogg, K. Kiyono, H. Takagi, J. J. Krajewski, W. F. Peck, Jr., L. W. Rupp, Jr., and C. H. Chen, Localized-to-itinerant electron transition in  $\text{Sr}_2\text{Ir}_{1-x}\text{Ru}_x\text{O}_4$ , *Phys. Rev. B* 49, 11890 (1994).
